# Supplementary material
Source: Springer Nature journal article supplement (https://www.springermedizin.de/resource/supplementary/12885_2014_4687_MOESM1_ESM.pdf/9467034)

- “I’ve found living with the pain in my hip and my back quite difficult because I’ve figured that wasn’t good quality of life because if I can’t bend down to do my shoes on or get in and out of bed ... you know that isn’t good quality of life”
- “Obviously you are sick and it makes you feel nauseous ... [this affects] quality of life because, you know, you can’t go anywhere, you’re sort of housebound or hospital bound”
- Q: “Do you think the breathlessness affected your quality of life?”  
A: “Well yes, because it slowed me down ... I couldn’t do any housework, couldn’t sort of cook for myself, I couldn’t do, I just felt like I couldn’t do anything”
- Q: “And do the symptoms in your back have an effect on your quality of your life?”  
A: “No it didn’t stop me doing anything and they’ve gone now anyway. (Pause) No it didn’t stop me doing anything just carried on the same”

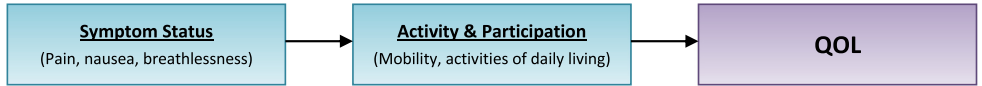

- “When I was on chemotherapy recently, on high dose steroids, you don’t quite realise it yourself, but by the end of that I was, you know, crying for no reason, which is not me at all, and quite emotional about things, or short tempered. And that, that can have a real negative effect [on QOL]”
- “[The Hickman line is] an invasion of your body ... you’ve got something there that you’ve got to be careful of ... I didn’t like that at all”

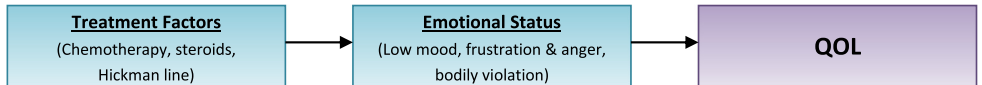

- “Well unfortunately part of the chemotherapy has, um, shrunk my cervix so I can no longer have sex, which is a bit of a disaster”

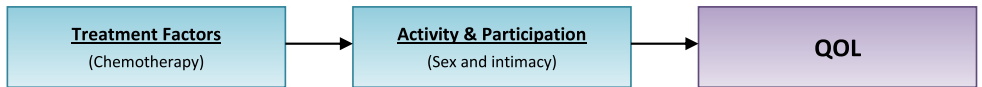

- A: “The Thalidomide, I mean I’ve got a weakness in the legs, you know, they sort of, I feel as though I’m numb”  
Q: “Mm. Does that affect your quality of life?”  
A: “A little bit, yeah, yeah, say...”  
Q: “Why is that?”  
A: “Well I find it difficult sometimes to walk too far”

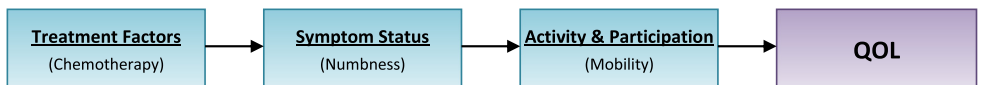

- “I’m not getting enough support that I need ... this sickness stop me from work ‘cos it broken my back, my spine, and I’m not working right now. I have a mortgage to pay, I’ve a lot of bills to pay, and it’s just hand to mouth, you know, I haven’t got enough at this moment, you know. So life is much harder now more than when I used to work”

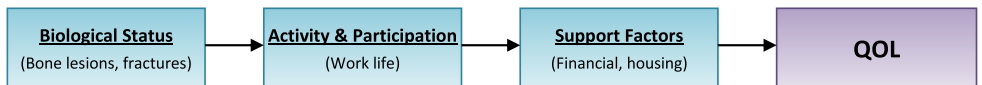

Supplement: MOESM1 [file 9467034]
